# Supplementary material
Source: bioRxiv or medRxiv preprint supplement (https://www.biorxiv.org/highwire/filestream/76328/field_highwire_adjunct_files/0/249227-1.pdf)

# Figure S1

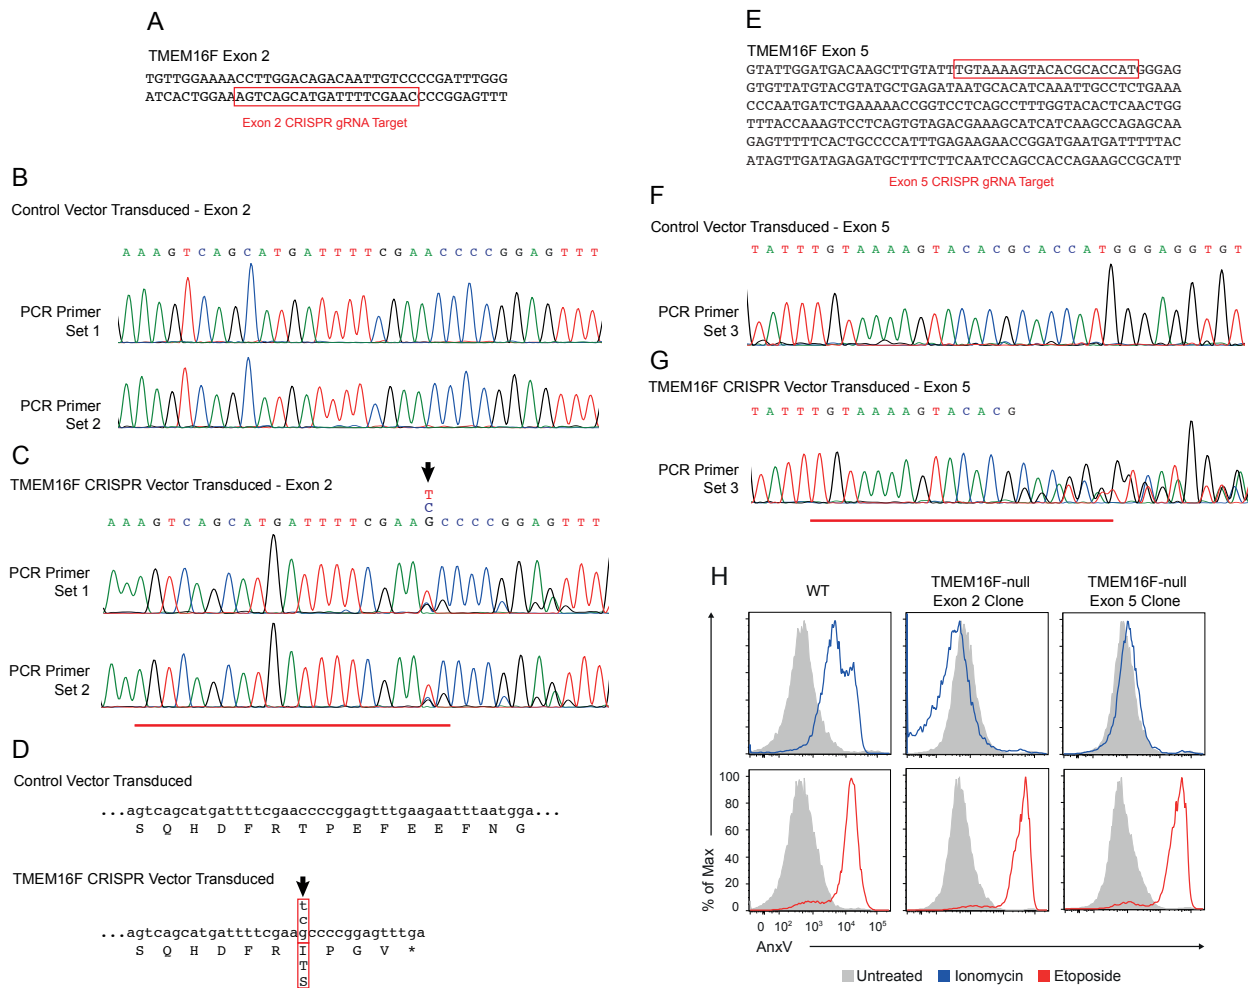

Supplement: Supplementary file [file 249227-1.pdf]
